# Supplementary material for: International core outcome set for clinical trials of medication review in multi-morbid older patients with polypharmacy
Source: PubMed Central journal article supplement (PMC5809844; doi:10.1186/s12916-018-1007-9), 2018-02-13
Supplement: 12916_2018_1007_MOESM1_ESM.pdf [file 12916_2018_1007_MOESM1_ESM.pdf]

**S-Table 1:** COS-STAR checklist as recommended by Kirkham et al.<sup>30</sup>

| SECTION/TOPIC             | CHECKLIST ITEM                                                                                                                                                                                                 | Location                                                                  |
|---------------------------|----------------------------------------------------------------------------------------------------------------------------------------------------------------------------------------------------------------|---------------------------------------------------------------------------|
| <b>TITLE/ABSTRACT</b>     |                                                                                                                                                                                                                |                                                                           |
| Title                     | Identify in the title that the paper reports the development of a COS                                                                                                                                          | Title page                                                                |
| Abstract                  | Provide a structured summary                                                                                                                                                                                   | Abstract                                                                  |
| <b>INTRODUCTION</b>       |                                                                                                                                                                                                                |                                                                           |
| Background and objectives | Describe the background and explain the rationale for developing the COS                                                                                                                                       | Introduction; §1                                                          |
|                           | Describe the specific objectives with reference to developing a COS                                                                                                                                            | Introduction; §2                                                          |
| Scope                     | Describe the health condition(s) and population(s) covered by the COS                                                                                                                                          | Introduction; §3                                                          |
|                           | Describe the intervention(s) covered by the COS                                                                                                                                                                | Introduction; §3                                                          |
|                           | Describe the setting(s) in which the COS is to be applied                                                                                                                                                      | Introduction; §3                                                          |
| <b>METHODS</b>            |                                                                                                                                                                                                                |                                                                           |
| Protocol/Registry Entry   | Indicate where the COS development protocol can be accessed, if available and/or the study registration details                                                                                                | Methods; “Study design” part.                                             |
| Participants              | Describe the rationale for stakeholder groups involved in the COS development process, eligibility criteria for participants from each group and a description of how the individuals involved were identified | Methods; “Delphi questionnaire survey” part.                              |
| Information sources       | Describe the information sources used to identify an initial list of outcomes                                                                                                                                  | Methods; “List of potential outcomes for inclusion in Delphi survey” part |
|                           | Describe how outcomes were dropped/combined, with reasons (if applicable)                                                                                                                                      | Methods; “List of potential outcomes for inclusion in Delphi survey” part |
| Consensus process         | Describe how the consensus process was undertaken                                                                                                                                                              | Methods; “Delphi questionnaire survey” part.                              |
| Outcome scoring           | Describe how outcomes were scored and scores summarised                                                                                                                                                        | Methods; “Delphi questionnaire survey” part.                              |
| Consensus definition      | Describe the consensus definition                                                                                                                                                                              | Methods; “Delphi questionnaire survey” part.                              |
|                           | Describe the procedure for determining how outcomes were included or excluded from consideration during the consensus process                                                                                  | Methods; “Delphi questionnaire survey” and “Consensus meetings” parts.    |
| Ethics and consent        | Provide a statement regarding the ethics and consent issues for the study                                                                                                                                      | Methods; “Ethical approval” part                                          |

| <b>RESULTS</b>           |                                                                                                                                                                                 |                                                                                                                  |
|--------------------------|---------------------------------------------------------------------------------------------------------------------------------------------------------------------------------|------------------------------------------------------------------------------------------------------------------|
| Protocol deviations      | Describe any changes from the protocol (if applicable), with reasons, and describe what impact these changes have on the results                                                | Methods; “Protocol adaptations” part.                                                                            |
| Participants             | Present data on the number and relevant characteristics of the people involved at all stages of COS development                                                                 | Results; “Delphi survey” part                                                                                    |
| Outcomes                 | List all outcomes considered at the start of the consensus process<br>Describe any new outcomes introduced and any outcomes dropped, with reasons, during the consensus process | Supplementary data; S-Table 2<br>Results “Delphi survey” and “international consensus” parts; Table 1; S-Table 4 |
| Core outcome set         | List the outcomes in the final core outcome set                                                                                                                                 | Table 2                                                                                                          |
| <b>DISCUSSION</b>        |                                                                                                                                                                                 |                                                                                                                  |
| Limitations              | Discuss any limitations in the COS development process                                                                                                                          | Discussion section                                                                                               |
| Conclusions              | Provide an interpretation of the final COS in the context of other evidence, and implications for future research                                                               | Discussion section                                                                                               |
| <b>OTHER INFORMATION</b> |                                                                                                                                                                                 |                                                                                                                  |
| Funding                  | Describe sources of funding, role of funders                                                                                                                                    | Acknowledgments                                                                                                  |
| Conflicts of interest    | Describe any conflicts of interest within the study team and how these were managed                                                                                             | Conflict of interest                                                                                             |
