# Supplementary material for: International core outcome set for clinical trials of medication review in multi-morbid older patients with polypharmacy
Source: PubMed Central journal article supplement (PMC5809844; doi:10.1186/s12916-018-1007-9), 2018-02-13
Supplement: 12916_2018_1007_MOESM4_ESM.pdf [file 12916_2018_1007_MOESM4_ESM.pdf]

**S-Table 3:** Characteristics of the participants in the Delphi survey (all three rounds).

|                                  | Round 1<br>No. (%)    | Round 2<br>No. (%)    | Round 3<br>No. (%)    |
|----------------------------------|-----------------------|-----------------------|-----------------------|
| <b>TOTAL participants</b>        | <b><i>n</i> = 150</b> | <b><i>n</i> = 136</b> | <b><i>n</i> = 129</b> |
| <b>Patient participants*</b>     | <b><i>n</i> = 55</b>  | <b><i>n</i> = 49</b>  | <b><i>n</i> = 46</b>  |
| Age (years)                      |                       |                       |                       |
| 65-80                            | 28 (54.9)             | 26 (56.5)             | 23 (53.5)             |
| > 80                             | 23 (45.1)             | 20 (43.5)             | 20 (46.5)             |
| Sex                              |                       |                       |                       |
| Female                           | 25 (56.8)             | 23 (59)               | 21 (58.3)             |
| Male                             | 19 (43.2)             | 16 (41)               | 15 (41.7)             |
| Place of living                  |                       |                       |                       |
| Own home                         | 41 (85.4)             | 36 (85.7)             | 33 (84.6)             |
| Nursing Home                     | 7 (14.6)              | 6 (14.3)              | 6 (15.4)              |
| Centre                           |                       |                       |                       |
| Belgium (Brussels)               | 14 (25.5)             | 13 (26.5)             | 11 (23.9)             |
| Ireland (Cork)                   | 11 (20.0)             | 10 (20.5)             | 10 (21.7)             |
| Netherlands (Utrecht)            | 14 (25.5)             | 13 (26.5)             | 12 (26.1)             |
| Switzerland (Bern)               | 16 (29.1)             | 13 (26.5)             | 13 (28.3)             |
| Relationship for carers          | (n=13)                | (n=12)                | (n=11)                |
| Partner                          | 5 (38.5)              | 5 (41.7)              | 5 (45.4)              |
| Child                            | 3 (23.1)              | 3 (25.0)              | 2 (18.2)              |
| Other                            | 1 ( 7.7)              | 1 (8.3)               | 1 (9.1)               |
| Missing data                     | 4 (30.8)              | 3 (25.0)              | 3 (27.3)              |
| <b>Health care professionals</b> | <b><i>n</i> = 55</b>  | <b><i>n</i> = 52</b>  | <b><i>n</i> = 50</b>  |
| Age (years)                      |                       |                       |                       |
| ≤ 30                             | 9 (16.4)              | 9 (17.3)              | 9 (18)                |
| 30-40                            | 22 (40.0)             | 22 (42.3)             | 20 (40)               |
| 41-50                            | 16 (29.1)             | 13 (25.0)             | 13 (26)               |
| 51-64                            | 8 (14.5)              | 8 (15.4)              | 8 (16)                |
| Sex                              |                       |                       |                       |
| F                                | 33 (60)               | 31 (59.6)             | 30 (60)               |
| M                                | 22 (40)               | 21 (39.4)             | 20 (40)               |
| Profession                       |                       |                       |                       |
| GP                               | 20 (36.4)             | 19 (36.5)             | 19 (38)               |
| Hospital physician               | 10 (18.2)             | 9 (17.3)              | 9 (18)                |
| Pharmacist                       | 13 (23.6)             | 12 (23.1)             | 10 (20)               |
| Nurse                            | 12 (21.8)             | 12 (23.1)             | 12 (24)               |
| Place of practice                |                       |                       |                       |
| Community setting                | 30 (54.5)             | 28 (53.8)             | 27 (54)               |
| Hospital                         | 20 (36.4)             | 19 (36.5)             | 18 (36)               |
| Nursing Homes                    | 5 (9.1)               | 5 (9.6)               | 5 (10)                |
| Centre                           |                       |                       |                       |
| Belgium (Brussels)               | 14 (25.5)             | 14 (26.9)             | 14 (28)               |
| Ireland (Cork)                   | 13 (23.6)             | 13 (25.0)             | 13 (26)               |
| Netherlands (Utrecht)            | 18 (32.7)             | 15 (28.8)             | 13 (26)               |
| Switzerland (Bern)               | 10 (18.2)             | 10 (19.2)             | 10 (20)               |

| <b>Experts</b>          | <b><i>n</i> = 40</b> | <b><i>n</i> = 36</b> | <b><i>n</i> = 33</b> |
|-------------------------|----------------------|----------------------|----------------------|
| Age (years)             |                      |                      |                      |
| ≤ 30                    | 2 (5.1)              | 2 (6)                | 2 (6.2)              |
| 30-40                   | 6 (15.4)             | 5 (14)               | 4 (12.5)             |
| 41-50                   | 8 (20.5)             | 7 (20)               | 6 (18.8)             |
| 51-64                   | 23 (59.0)            | 21 (60)              | 20 (62.5)            |
| Sex                     |                      |                      |                      |
| F                       | 16 (40)              | 14 (38.9)            | 12 (36.4)            |
| M                       | 24 (60)              | 22 (60.1)            | 21 (63.6)            |
| Profession              |                      |                      |                      |
| Researchers med. Field  | 24 (60.0)            | 23 (63.9)            | 22 (66.7)            |
| Researchers other field | 9 (22.5)             | 9 (25.0)             | 4 (12.1)             |
| Other                   | 7 (17.5)             | 4 (11.1)             | 7 (21.2)             |
| Country                 |                      |                      |                      |
| Australia               | 3                    | 3                    | 3                    |
| Belgium                 | 6                    | 5                    | 5                    |
| Canada                  | 2                    | 2                    | 2                    |
| France                  | 1                    | 1                    | 1                    |
| Germany                 | 1                    | 1                    | 1                    |
| Ireland (Cork)          | 8                    | 8                    | 7                    |
| Italy                   | 1                    | 1                    | 1                    |
| Netherlands             | 2                    | 2                    | 2                    |
| Norway                  | 1                    | 1                    | 1                    |
| Switzerland             | 5                    | 3                    | 2                    |
| UK                      | 4                    | 3                    | 2                    |
| USA                     | 6                    | 6                    | 6                    |

\* Age, sex and place of living are those of the patient, whoever (patient or caregiver) participated
