# Supplementary material for: International core outcome set for clinical trials of medication review in multi-morbid older patients with polypharmacy
Source: BMC Med. 2018 Feb 13;16:21. doi: 10.1186/s12916-018-1007-9 (PMC5809844; doi:10.1186/s12916-018-1007-9)
Supplement: Supplementary file 3 — Names of the health domains and subdomains used to classify the outcomes extracted from the systematic review and the qualitative study, according to the OMERAT Filter 2.0 classification. (PDF 96 kb) [file 12916_2018_1007_MOESM3_ESM.pdf]

**S-Table 2:** Names of the health domains and subdomains used to classify the outcomes extracted from the systematic review and the qualitative study, according to the OMERAT filter 2.0 classification

| Core Areas                         | Domains                   | Subdomains                                                                                     | Source  |
|------------------------------------|---------------------------|------------------------------------------------------------------------------------------------|---------|
| Patho-physiological manifestations | Medication use            | Number of drugs                                                                                | SR + QS |
|                                    |                           | Unnecessary drugs (Overuse)                                                                    | SR + QS |
|                                    |                           | Underuse                                                                                       | SR      |
|                                    |                           | Renal impairment dose adjustment                                                               | SR      |
|                                    |                           | Drug-drug interaction                                                                          | SR      |
|                                    |                           | Potentially inappropriate medications                                                          | SR + QS |
|                                    |                           | Anticholinergic drug use                                                                       | SR      |
|                                    |                           | Psychotropic drug use                                                                          | SR      |
|                                    |                           | Measurement of the appropriateness                                                             | SR      |
|                                    |                           | Compliance with medication                                                                     | SR      |
|                                    |                           | Switch to generic drugs                                                                        | QS      |
|                                    |                           | Resumption of discontinued drugs during follow-up                                              | SR      |
| Death                              | Death                     | All-cause death                                                                                | SR      |
| Life impact                        | Patient reported outcomes | Ease of taking treatment for an older person (form, preparation, management plan, etc.)        | SR + QS |
|                                    |                           | Patients' knowledge of their medications                                                       | SR      |
|                                    |                           | Patients' beliefs about medications concerns                                                   | SR      |
|                                    |                           | Patients' beliefs about medications necessity                                                  | SR      |
|                                    |                           | Health-related quality of life                                                                 | SR      |
|                                    |                           | Physical symptoms and complaints                                                               | SR + QS |
|                                    |                           | Pain relief                                                                                    | QS      |
|                                    |                           | Psychological symptoms                                                                         | SR + QS |
|                                    |                           | Social life activities                                                                         | QS      |
|                                    |                           | Sleep quality                                                                                  | SR + QS |
|                                    |                           | Elicitation and consideration of patient preference                                            | SR      |
|                                    |                           | Patient's information about the changes in his/her treatment made during the medication review | SR + QS |
|                                    |                           | Patient satisfaction with the medication review                                                | SR      |
|                                    | Geriatric syndromes       | Urinary incontinence                                                                           | SR      |
|                                    |                           | Depression                                                                                     | SR      |
|                                    |                           | Behavioural disorders                                                                          | SR      |
|                                    |                           | Dementia, cognitive disorders                                                                  | SR      |
|                                    |                           | Delirium                                                                                       | SR      |
|                                    |                           | Use of physical restraint in patient with behaviour problems                                   | SR      |

|                                        |                                   |                                                                                                      |         |
|----------------------------------------|-----------------------------------|------------------------------------------------------------------------------------------------------|---------|
|                                        |                                   | Activities of Daily Living                                                                           | SR      |
|                                        |                                   | Dizziness                                                                                            | SR      |
|                                        |                                   | Gait speed                                                                                           | SR      |
|                                        |                                   | Falls occurrence                                                                                     | SR      |
|                                        |                                   | Risk of falling                                                                                      | SR      |
|                                        |                                   | Fractures                                                                                            | SR      |
| Resource use /<br>economical<br>impact | Use of<br>healthcare<br>resources | Hospitalisation (all causes hospitalisation)                                                         | SR      |
|                                        |                                   | Length of hospital stay                                                                              | SR      |
|                                        |                                   | Emergency Room visits                                                                                | SR      |
|                                        |                                   | Number of GP visits                                                                                  | SR      |
|                                        |                                   | cardiovascular morbidity                                                                             | SR + QS |
|                                        |                                   | Risk of going to a nursing home                                                                      | SR      |
|                                        | Adverse<br>events                 | Drug-related hospital admissions                                                                     | SR      |
|                                        |                                   | Adverse drug reaction                                                                                | SR + QS |
|                                        |                                   | Serious adverse drug reaction                                                                        | SR + QS |
|                                        |                                   | Prescribing cascade                                                                                  | QS      |
|                                        |                                   | Adverse drug withdrawal event                                                                        | SR      |
|                                        | Costs                             | Direct costs = costs of medications                                                                  | SR + QS |
|                                        |                                   | Waste of drugs                                                                                       | QS      |
|                                        |                                   | Indirect costs                                                                                       | SR      |
|                                        |                                   | Cost-effectiveness                                                                                   | SR      |
| Others                                 | Process<br>evaluation             | Number of drugs discontinued or with dosage changed                                                  | SR      |
|                                        |                                   | Number of drugs initiated                                                                            | SR      |
|                                        |                                   | Clinical relevance of modifications proposed during the medication review                            | SR      |
|                                        |                                   | Confirmation that medication reviews have taken place                                                | SR      |
|                                        |                                   | Check that the medical condition of the patient was assessed before performing the medication review | QS      |
|                                        |                                   | Involvement of the patient's GP in the medication review                                             | QS      |
|                                        |                                   | Shared decision making process with the patient                                                      | SR      |
|                                        |                                   | Number of recommendations that have been accepted by the physician in charge of the patient          | SR      |
|                                        |                                   | Barriers and facilitators for medication review in the elderly                                       | SR      |
|                                        |                                   | Time spent by all healthcare professionals and healthcare teams to perform the medication review     | SR      |
|                                        |                                   | Satisfaction of healthcare professionals with the medication review                                  | SR      |

*Abbreviations: SR: systematic review; QS: qualitative study*
